# Supplementary material for: Functionalisation of gold nanoparticles with ruthenium(ii) polypyridyl complexes for their application in cellular imaging
Source: Royal Society of Chemistry journal article supplement (doi:10.1039/d0dt02754e), 2020-01-01
Supplement: d0dt02754e1.pdf [file d0dt02754e1.pdf]

## Electronic Supporting Information

### Functionalisation of gold nanoparticles with ruthenium(II) polypyridyl complexes for their application in cellular imaging

Sandra Estalayo-Adrián,<sup>\*ab</sup> Gavin J. McManus,<sup>c</sup> Hannah L. Dalton,<sup>a</sup> Aramballi J. Savyasachi,<sup>a</sup> John M. Kelly<sup>a</sup> and Thorfinnur Gunnlaugsson<sup>\*a</sup>

<sup>a</sup>School of Chemistry and Trinity Biomedical Sciences Institute (TBSI), Trinity College Dublin, The University of Dublin, Dublin 2, Ireland. E-mail: [estalays@tcd.ie](mailto:estalays@tcd.ie), [gunnlaut@tcd.ie](mailto:gunnlaut@tcd.ie)

<sup>b</sup>Advanced Materials and BioEngineering Research (AMBER) Centre, Trinity College Dublin, The University of Dublin, Dublin 2, Ireland

<sup>c</sup>School of Biochemistry and Immunology, Trinity Biomedical Sciences Institute (TBSI), Trinity College Dublin, The University of Dublin, Dublin 2, Ireland

| Table of Contents                                                                                                            | Page No |
|------------------------------------------------------------------------------------------------------------------------------|---------|
| <b>Fig. S1.</b> <sup>1</sup> H NMR spectrum of <b>3</b>                                                                      | S2      |
| <b>Fig. S2.</b> <sup>13</sup> C NMR spectrum of <b>3</b>                                                                     | S3      |
| <b>Fig. S3.</b> FTIR spectrum of <b>3</b>                                                                                    | S3      |
| <b>Fig. S4.</b> <sup>1</sup> H NMR spectrum of <b>1</b>                                                                      | S4      |
| <b>Fig. S5.</b> <sup>13</sup> C NMR spectrum of <b>1</b>                                                                     | S5      |
| <b>Fig. S6.</b> FTIR spectrum of <b>1</b>                                                                                    | S5      |
| <b>Fig. S7.</b> ESI <sup>+</sup> -HRMS spectrum of <b>1</b>                                                                  | S6      |
| <b>Fig. S8.</b> <sup>1</sup> H NMR spectrum of <b>2</b>                                                                      | S6      |
| <b>Fig. S9.</b> <sup>13</sup> C NMR spectrum of <b>2</b>                                                                     | S7      |
| <b>Fig. S10.</b> FTIR spectrum of <b>2</b>                                                                                   | S7      |
| <b>Fig. S11.</b> MALDI <sup>+</sup> -HRMS spectrum of <b>2</b>                                                               | S8      |
| <b>Fig. S12.</b> UV-vis absorption, excitation and emission spectra of <b>1</b> , <b>2</b> , <b>1·AuNP</b> and <b>2·AuNP</b> | S8      |
| <b>Fig. S13.</b> Confocal fluorescence microscopy images of HeLa cells treated with <b>1</b>                                 | S9      |
| <b>Fig. S14.</b> Bright field images of HeLa cells treated with <b>1·AuNP</b> and <b>2·AuNP</b>                              | S9      |
| <b>Fig. S15.</b> Toxicity profiles of <b>1</b> and <b>2</b> in HeLa cells                                                    | S10     |

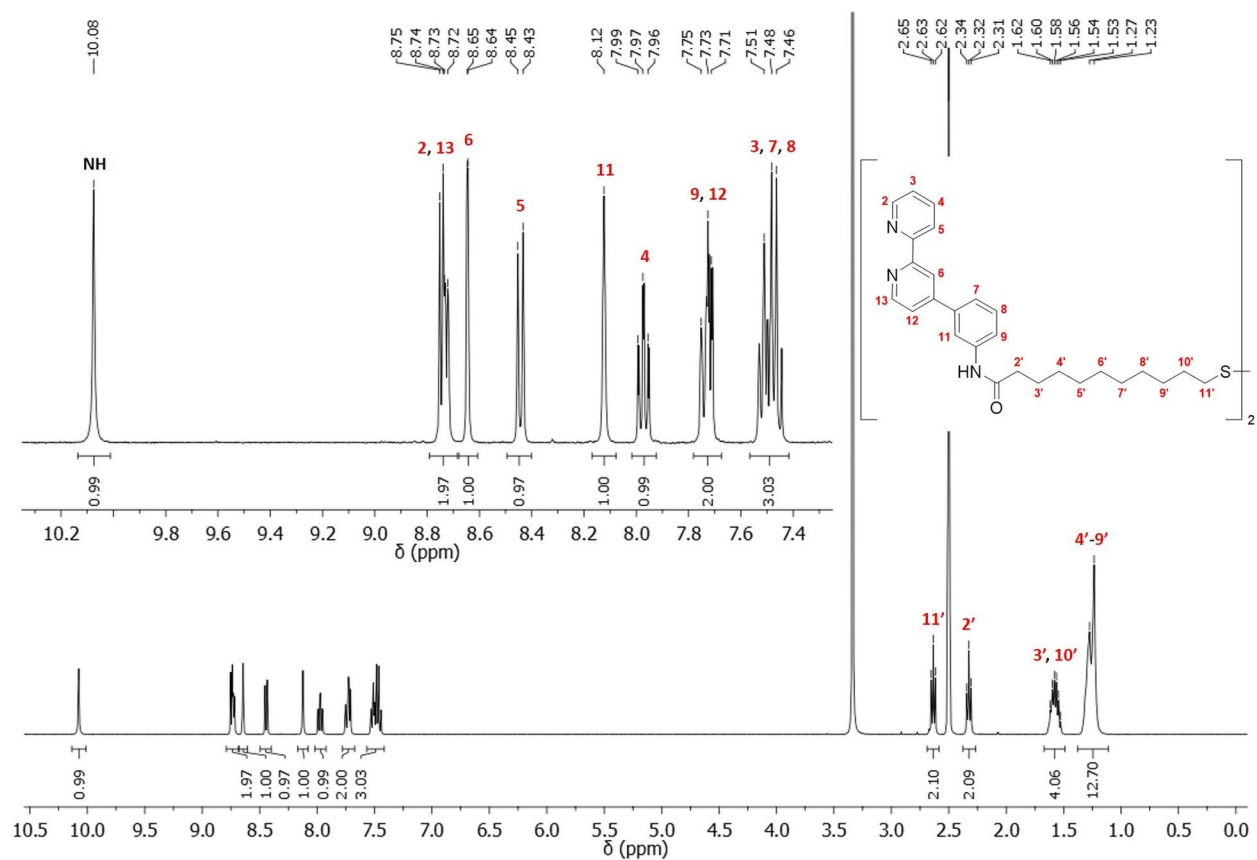

**Fig. S1.**  $^1\text{H}$  NMR (400 MHz,  $\text{DMSO-}d_6$ ) spectrum of ligand **3**.

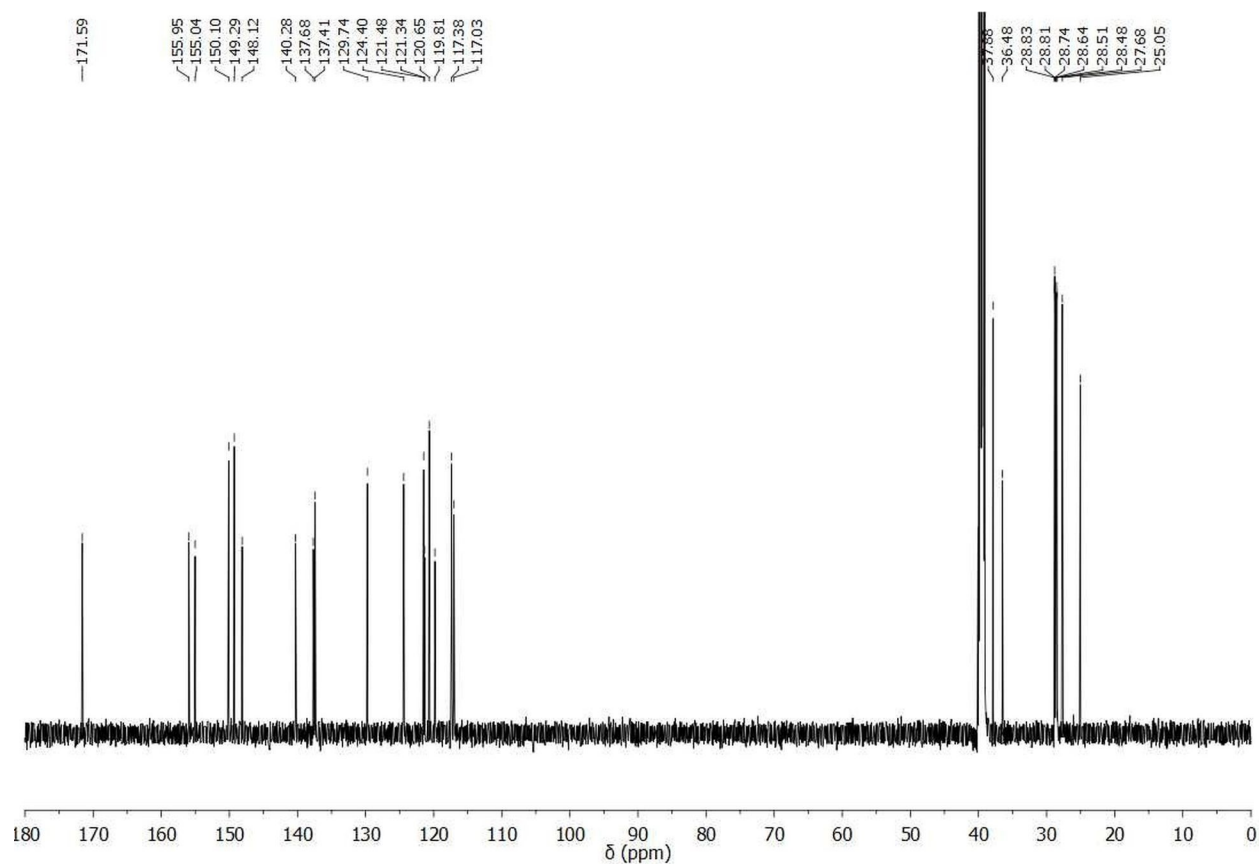

**Fig. S2.**  $^{13}\text{C}$  NMR (101 MHz,  $\text{DMSO-}d_6$ ) spectrum of ligand **3**.

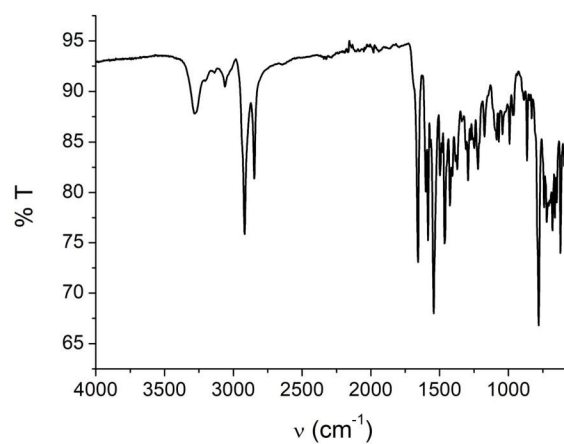

**Fig. S3.** FTIR spectrum of ligand **3**.

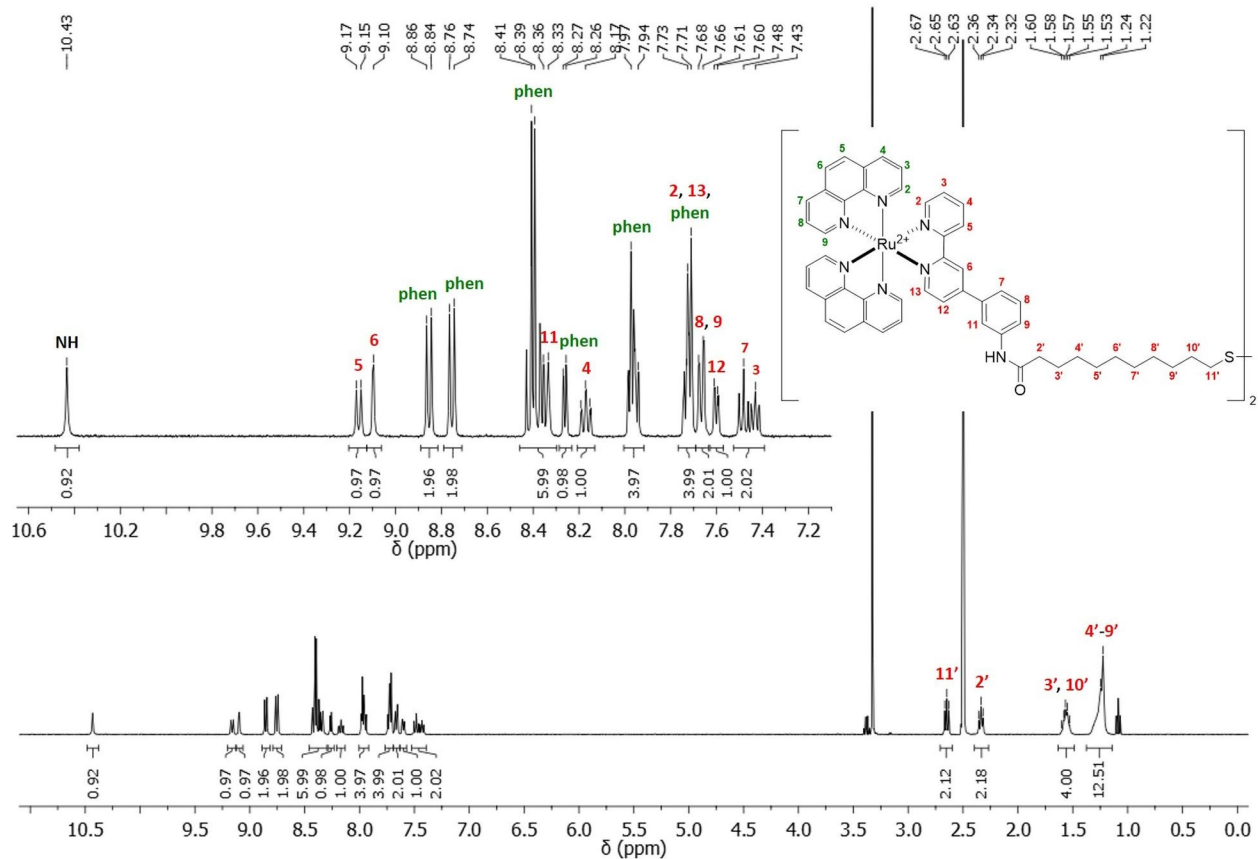

**Fig. S4.**  $^1\text{H}$  NMR (400 MHz,  $\text{DMSO-}d_6$ ) spectrum of complex **1**. Signals corresponding to **phen** ligands are in green and signals assigned to ligand **3** are in red.

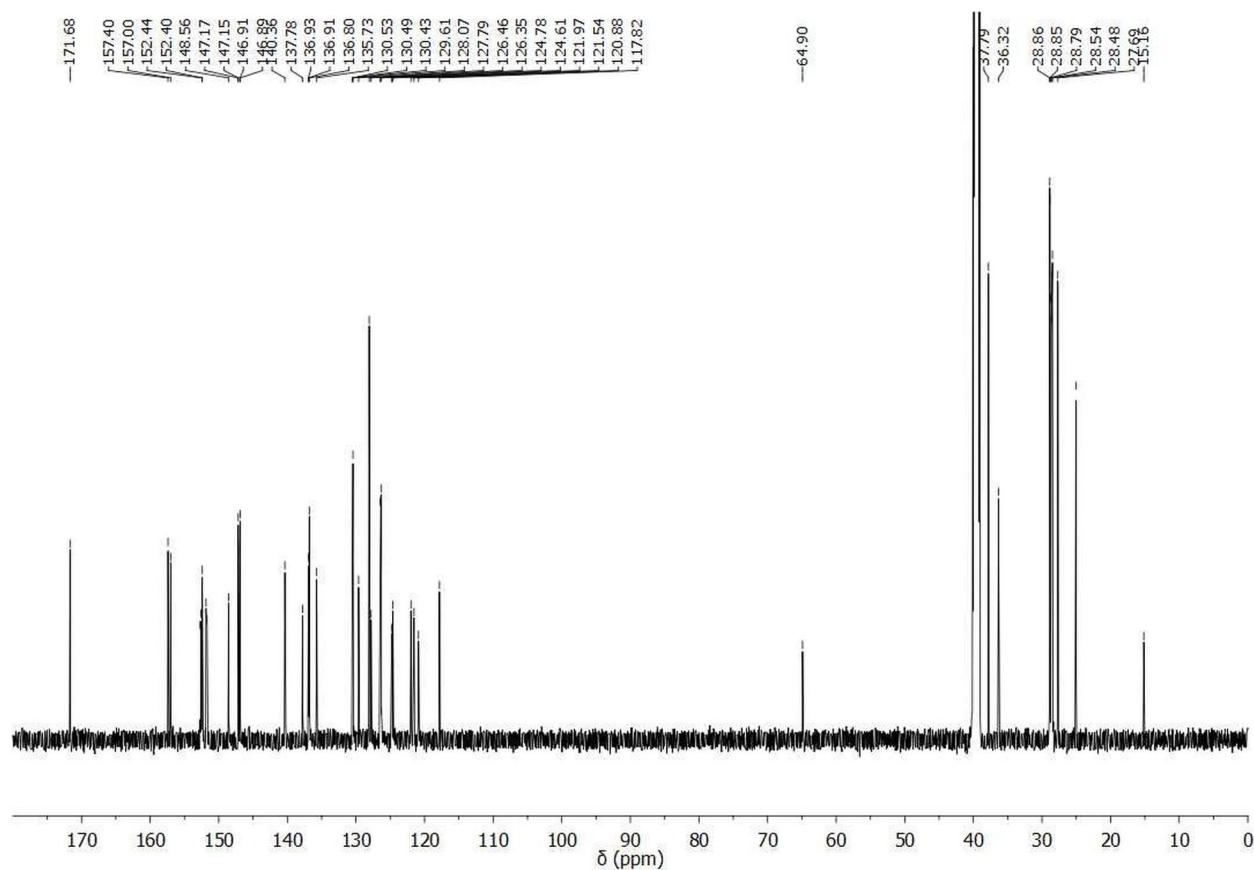

**Fig. S5.**  $^{13}\text{C}$  NMR (101 MHz,  $\text{DMSO-}d_6$ ) spectrum of complex **1**.

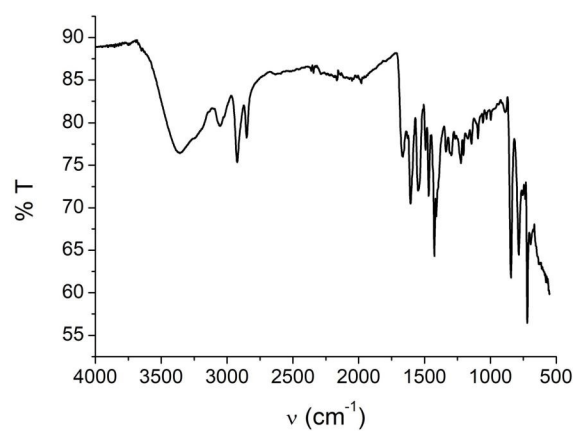

**Fig. S6.** FTIR spectrum of complex **1**.

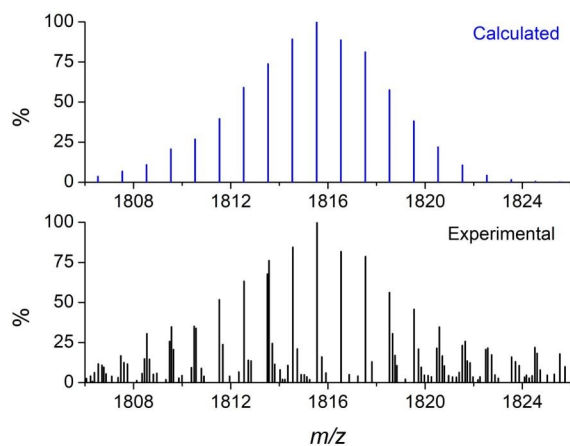

**Fig. S7.** Comparison between the calculated (blue) and experimental (black) isotopic distribution pattern for complex **1** from matrix-assisted laser desorption/ionisation (positive mode) high resolution mass spectrometry analysis.

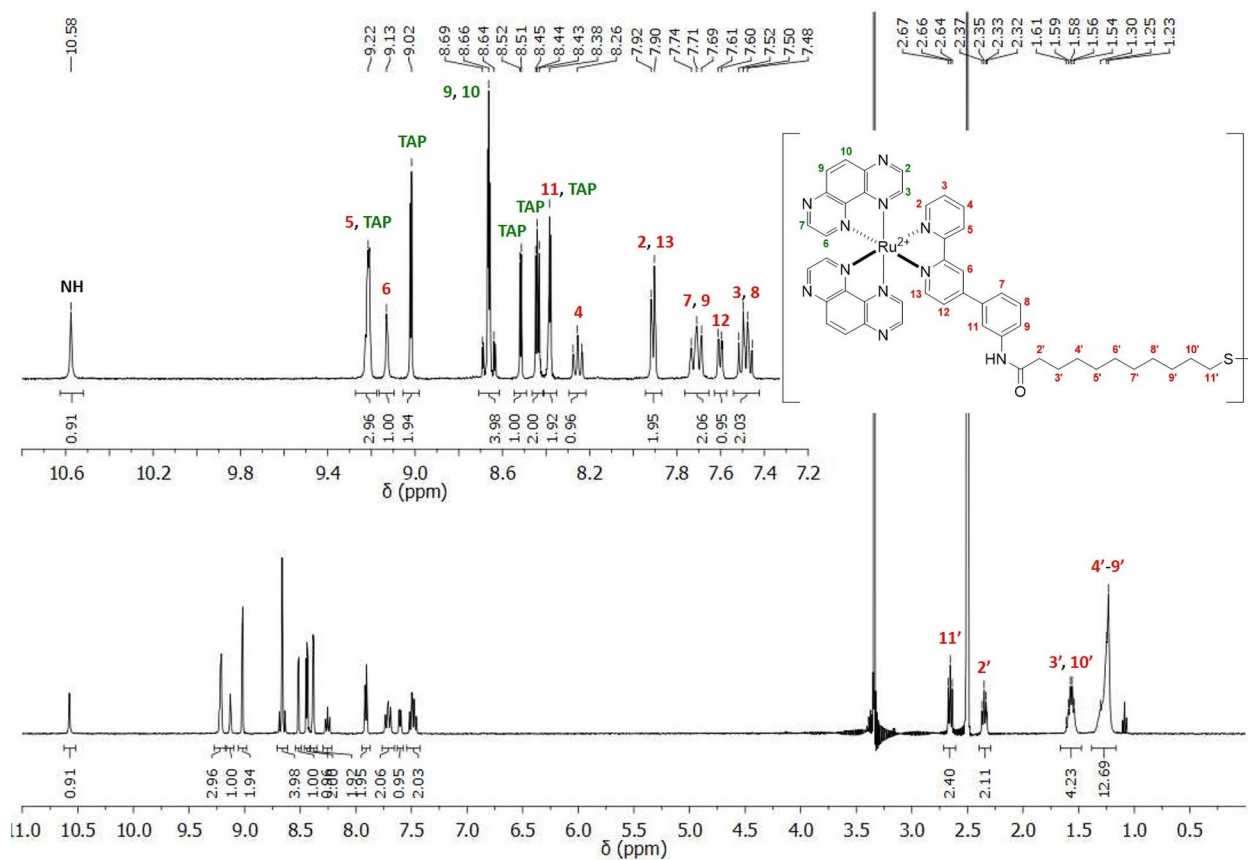

**Fig. S8.** <sup>1</sup>H NMR (400 MHz, DMSO-*d*<sub>6</sub>) spectrum of complex **2**. Signals corresponding to TAP ligands are in green and signals assigned to ligand **3** are in red.

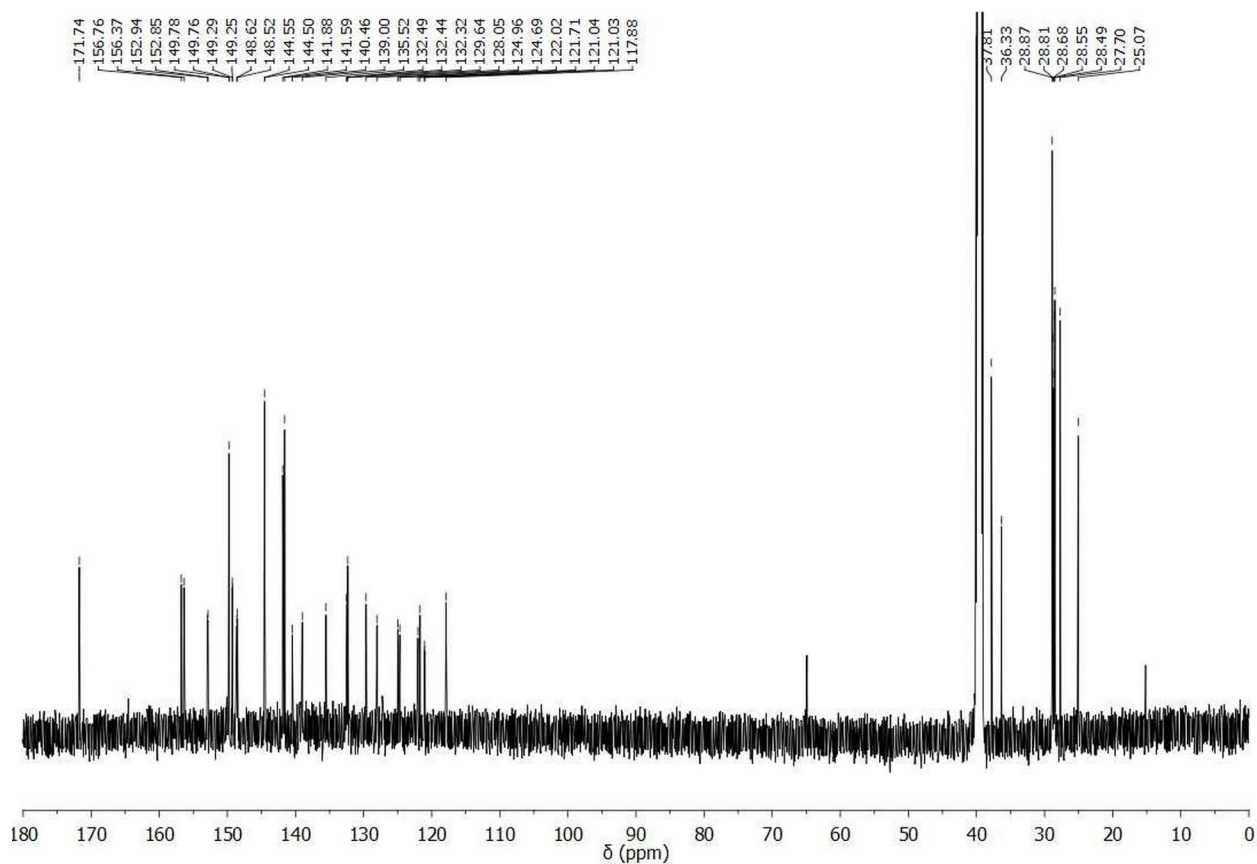

**Fig. S9.**  $^{13}\text{C}$  NMR (101 MHz,  $\text{DMSO-}d_6$ ) spectrum of complex **2**.

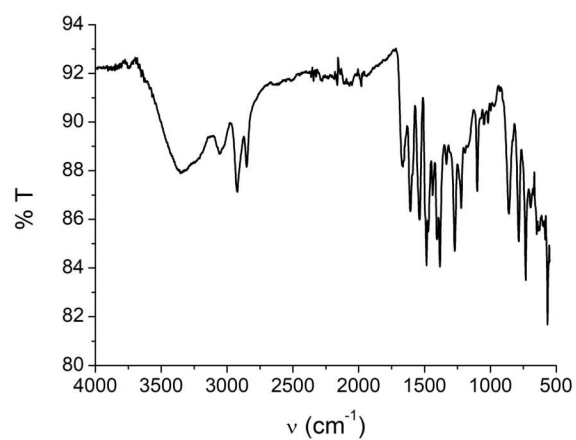

**Fig. S10.** FTIR spectrum of complex **2**.

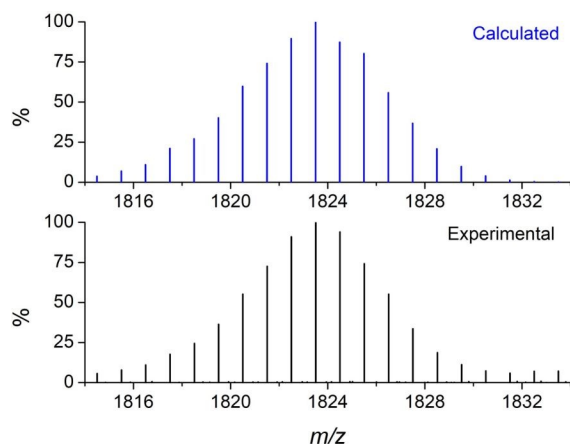

**Fig. S11.** Comparison between the calculated (blue) and experimental (black) isotopic distribution pattern for complex **2** from matrix-assisted laser desorption/ionisation (positive mode) high resolution mass spectrometry analysis.

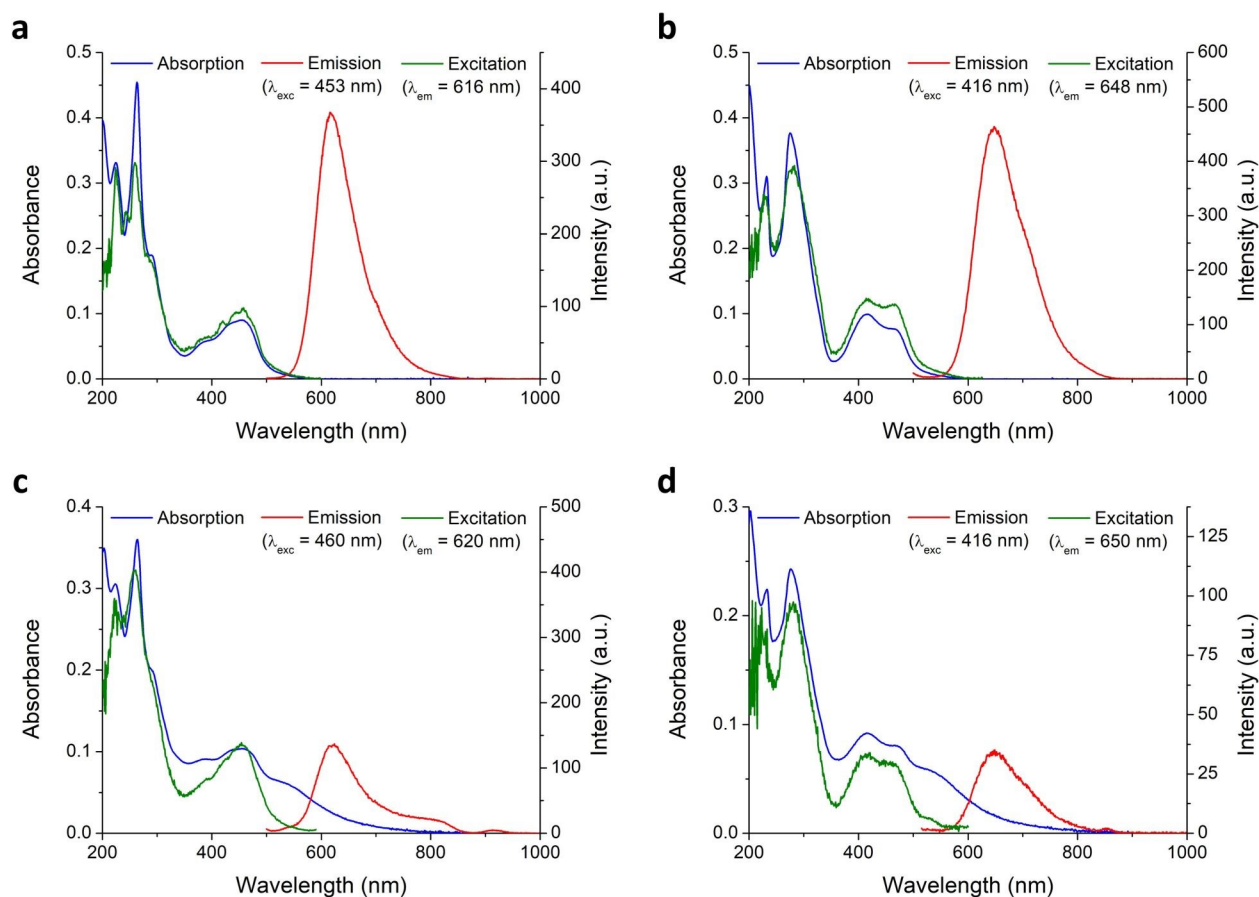

**Fig. S12.** UV-vis absorption, excitation and emission spectra of (a) **1**, (b) **2**, (c) **1**·AuNP and (d) **2**·AuNP in 10 mM sodium phosphate-buffered aqueous solution at pH 7.4, at 298 K.

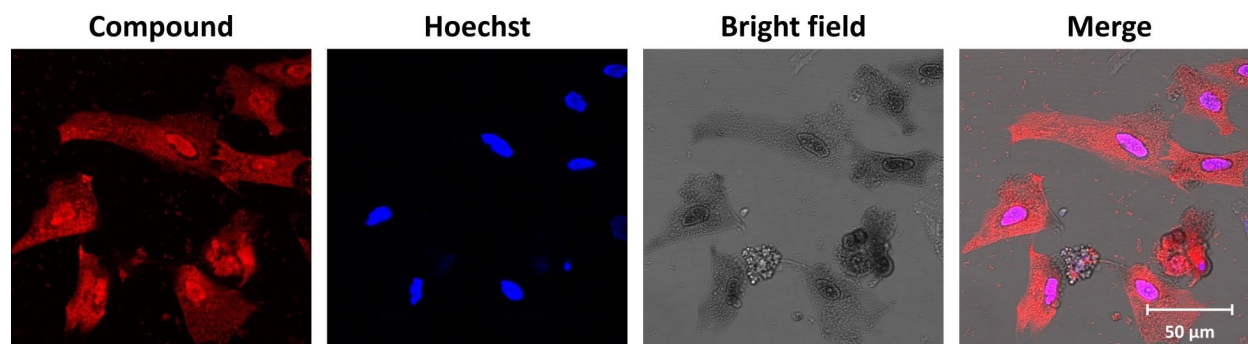

**Fig. S13.** Confocal fluorescence microscopy images of HeLa cells showing the nuclear uptake of **1** (red) at 20  $\mu\text{M}$  after 24 h incubation. The nucleus is stained blue with Hoechst 33258.

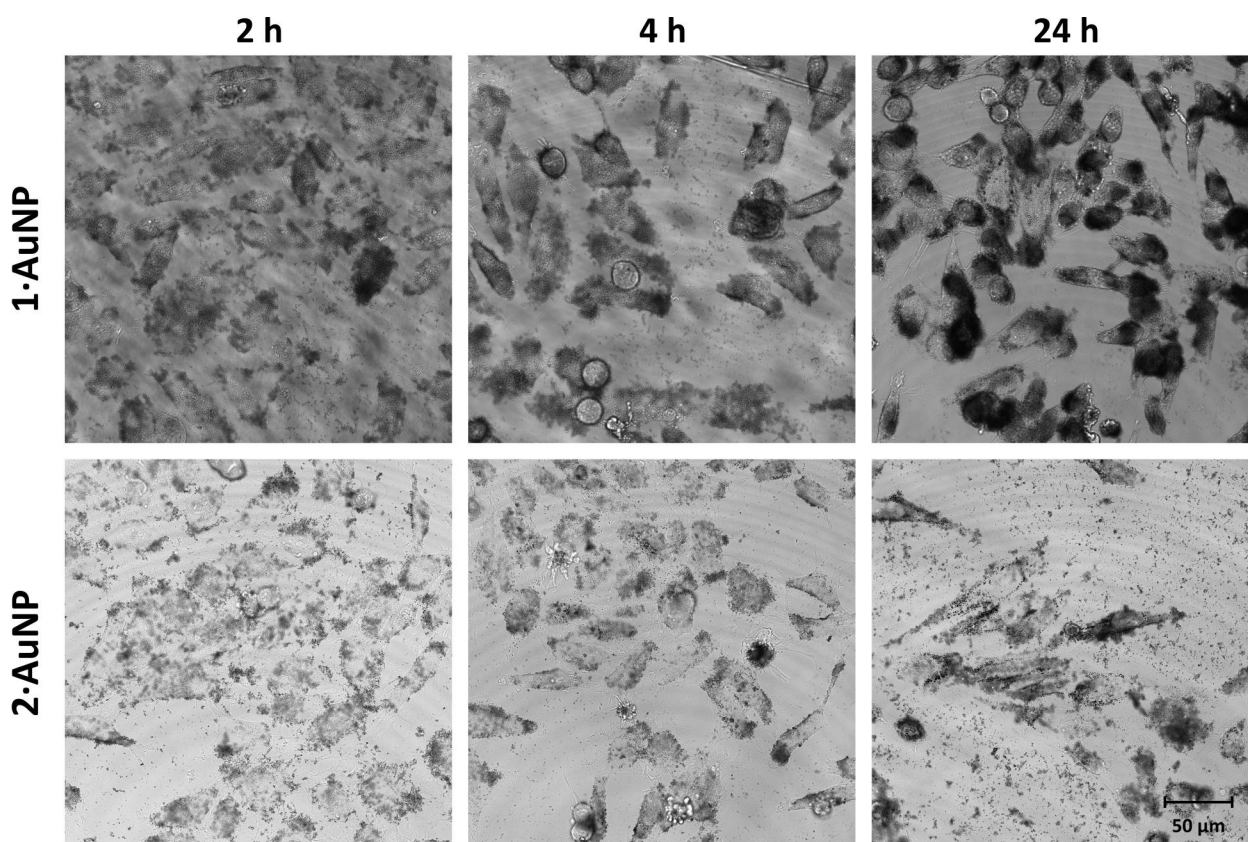

**Fig. S14.** Bright field images of HeLa cells showing the uptake of **1·AuNP** and **2·AuNP** at *ca.* 20  $\mu\text{M}$  Ru(II) complex concentration after 2, 4 and 24 h incubation.

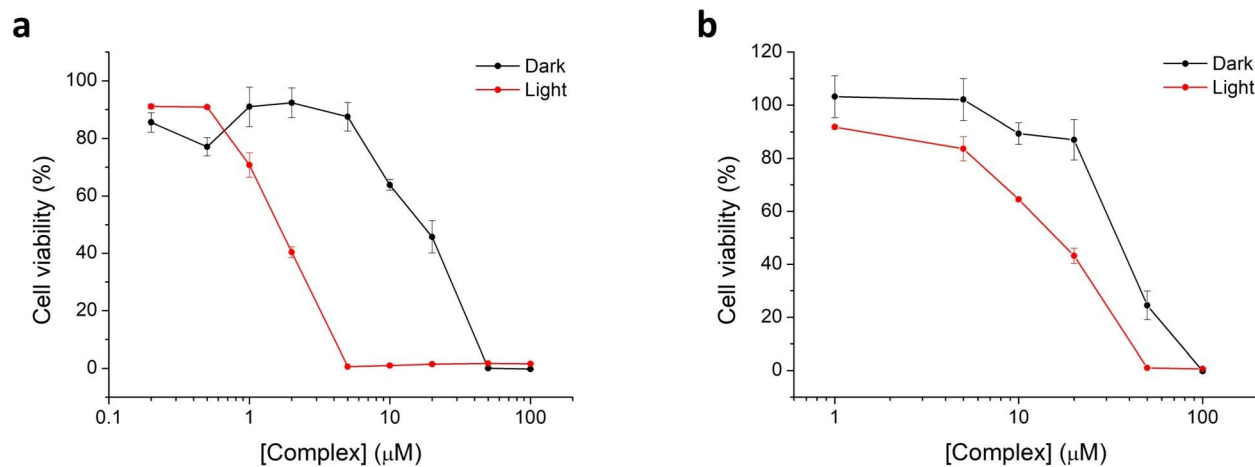

**Fig. S15.** Toxicity profiles of (a) **1** and (b) **2** in HeLa cells.
